# Supplementary material for: Highly efficient UV-sensing properties of Sb-doped ZnO nanorod arrays synthesized by a facile, single-step hydrothermal reaction
Source: Royal Society of Chemistry journal article supplement (doi:10.1039/c7ra07157d), 2017-01-01
Supplement: c7ra07157d1.pdf [file c7ra07157d1.pdf]

(Supporting Information)

**Highly efficient UV-sensing properties of Sb-doped ZnO  
nanorod arrays synthesized by a facile, single-step hydrothermal reaction**

Donghyung Kim,<sup>a</sup> Wuseok Kim,<sup>b</sup> Sangmin Jeon,<sup>b</sup> and Kijung Yong<sup>\*a</sup>

<sup>a</sup>Surface Chemistry Laboratory of Electronic Materials, Department of Chemical Engineering, Pohang University of Science and Technology (POSTECH), Pohang 790-784, Korea

<sup>b</sup>Smart Materials Sensors Laboratory, Department of Chemical Engineering, Pohang University of Science and Technology (POSTECH), Pohang 790-784, Korea

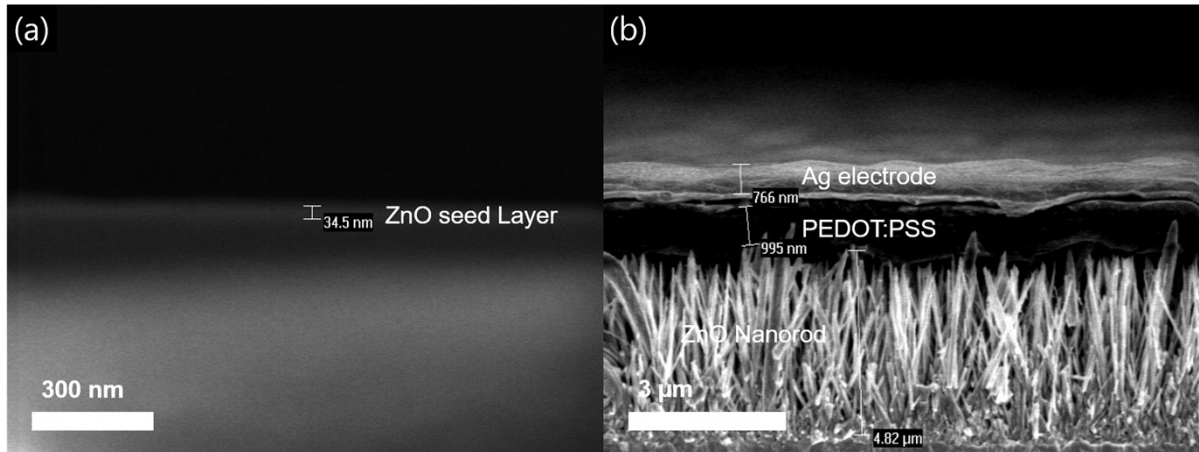

Figure S1. SEM cross-sectional view of (a) ZnO seed layer, and (b) Ag electrode on PEDOT:PSS covered Sb-doped ZnO NRAs

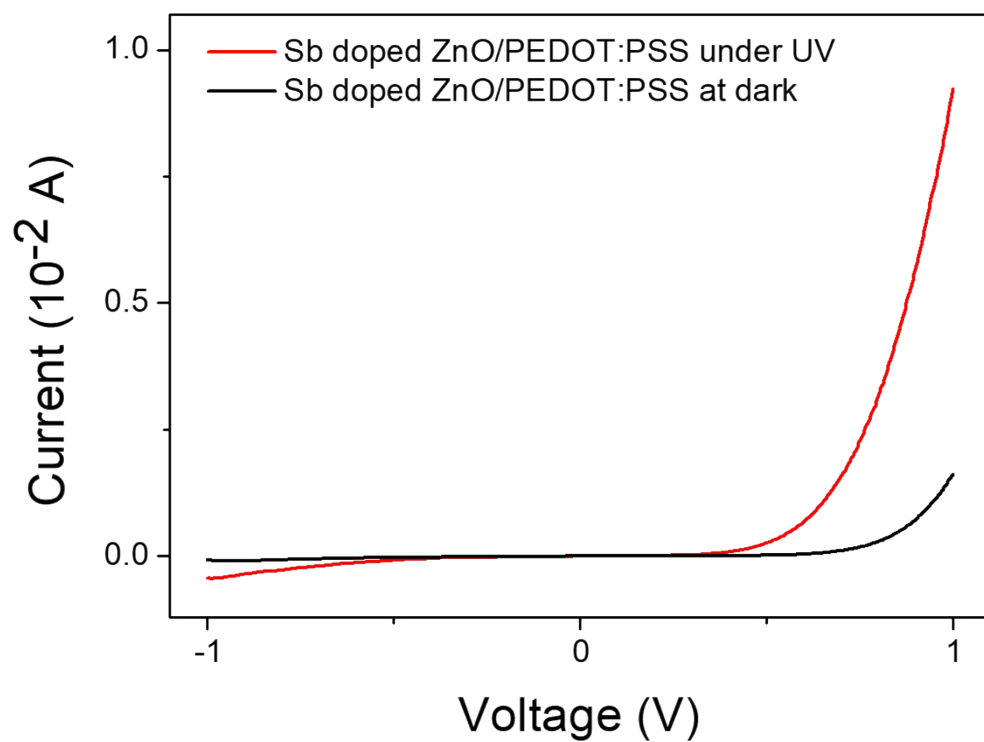

Figure S2. I-V curves of Sb-doped ZnO NRAs covered with PEDOT:PSS with and without UV illumination

| Ref. #         | name     | Wavelength (nm) | Voltage (V) | Intensity (W/cm <sup>2</sup> ) | Responsivity | Rise time constant | Falling time constant |
|----------------|----------|-----------------|-------------|--------------------------------|--------------|--------------------|-----------------------|
| 1 <sup>1</sup> | In:ZnO   | 390             | 1           | 2 * 10 <sup>-2</sup>           | 2.5          | -                  | -                     |
|                | Ga:ZnO   | 380             | 1           | 2 * 10 <sup>-2</sup>           | 5.45         | 2.45 s             | 4.0 s                 |
| 2 <sup>2</sup> | Li,N:ZnO | 360             | 20          | 2 * 10 <sup>-3</sup>           | 116          | -                  | -                     |
|                | Li,N:ZnO | 360             | 20          | 5 * 10 <sup>-8</sup>           | 216          | -                  | -                     |
| 3 <sup>3</sup> | Fe:ZnO   | 365             | 10          | 2 * 10 <sup>-4</sup>           | 12           | -                  | -                     |
| 4 <sup>4</sup> | Al:ZnO   | 365             | 1           | 3 * 10 <sup>2</sup>            | 0.031        | 0.7 s              | 2.5 s                 |
| Current Study  | Sb:ZnO   | 365             | 0.5         | 16 * 10 <sup>-6</sup>          | 53.5         | 338 s              | 124 s                 |
|                | Sb:ZnO   | 365             | 0           | 16 * 10 <sup>-6</sup>          | 0.02         | 233 s              | 80.5 s                |

Table S1. The comparison tabulation of sensing properties among several doped ZnO nanostructures.

## Reference

- 1 S.-J. Young, C.-C. Yang and L.-T. Lai, *J. Electrochem. Soc.*, 2017, **164**, B3013–B3028.
- 2 G. H. He, H. Zhou, H. Shen, Y. J. Lu, H. Q. Wang, J. C. Zheng, B. H. Li, C. X. Shan and D. Z. Shen, *Appl. Surf. Sci.*, 2017, **412**, 554–558.
- 3 A. Khayatian, V. Asgari, A. Ramazani, S. F. Akhtarianfar, M. A. Kashi and S. Safa, *Mater. Res. Bull.*, 2017, **94**, 77–84.
- 4 A. Zno, N. Structures, S. Young and Y. Liu, , DOI:10.1109/JSTQE.2017.2684540.
